# Supplementary material for: Community Paramedicine Program in Social Housing and Health Service Utilization: A Cluster Randomized Clinical Trial
Source: PubMed Central journal article supplement (PMC11581518; doi:10.1001/jamanetworkopen.2024.41288), 2024-10-28
Supplement: jamanetwopen-e2441288-s002.pdf [file jamanetwopen-e2441288-s002.pdf]

## Supplementary Online Content

Agarwal G, Pirrie M, Angeles R, et al. Community paramedicine program in social housing and health service utilization: a cluster randomized clinical trial. *JAMA Netw Open*. 2024;7(10):e2441288. doi:10.1001/jamanetworkopen.2024.41288

**eTable 1.** Disease and Procedure Codes

**eTable 2.** Medication Categories

**eTable 3.** Participant Characteristics of Intervention Building Residents, Control Building Residents, and Intervention Attendees Who Had Prescription Drug Claim Records Available ( $\geq$  66 Years or Eligible for the Ontario Drug Benefit)

**eTable 4.** Intention-to-Treat Analysis of Medication Initiation for All Intervention and Control Building Residents

**eTable 5.** Sensitivity Analysis of Healthcare Utilization and Medication Initiation Outcomes of Building Residents That Attended the Intervention Program

**eTable 6.** Sensitivity Analysis of Healthcare Utilization and Medication Initiation Outcomes of All Building Residents for a Subset of Buildings (N=26)

**eTable 7.** Sensitivity Analysis of Healthcare Utilization and Medication Initiation Outcomes of Building Residents That Attended the Intervention Program for a Subset of Buildings (N=26)

This supplementary material has been provided by the authors to give readers additional information about their work.

**eTable 1. Disease and Procedure Codes**

| ICD10 codes for cardiovascular disease and peripheral vascular disease                                                                                                                                                                                                                                                                                                                                                    |
|---------------------------------------------------------------------------------------------------------------------------------------------------------------------------------------------------------------------------------------------------------------------------------------------------------------------------------------------------------------------------------------------------------------------------|
| <p>NACRS AND DAD DIAGNOSIS CODES (DXTYPE 1 or 2, excluding suspect)</p> <p>AMI: 'I210', 'I211', 'I212', 'I213', 'I214', 'I219', 'I220', 'I221', 'I228', 'I229', 'I230', 'I231', 'I232', 'I233', 'I235', 'I236', 'I238', 'I241', 'I252', 'I256'</p> <p>Stroke: 'I60', 'I61', 'I630', 'I631', 'I632', 'I633', 'I634', 'I635', 'I636', 'I638', 'I639', 'I64', 'H341'</p> <p>CHD/PVD: I25x, I70x, I71x, I73x, I74x, K55.1</p> |
| <p>SDS AND DAD PROCEDURE CODES</p> <p>PCI: CCI 1IJ50, 1IJ57GQ</p> <p>CABG: CCI 1IJ76</p> <p>Carotid endarterectomy: CCI 1JE57</p>                                                                                                                                                                                                                                                                                         |
| Lab Testing Codes                                                                                                                                                                                                                                                                                                                                                                                                         |
| <p>KIDNEY</p> <ul style="list-style-type: none"> <li>• L067 - LAB. MED.-BIOCHEM-CREATININE (NOT WITH L068).</li> </ul>                                                                                                                                                                                                                                                                                                    |
| <p>ELECTROLYTE</p> <ul style="list-style-type: none"> <li>• L204 - LAB. MED.-BIOCHEM.-POTASSIUM</li> <li>• L226 - LAB. MED.-BIOCHEM.-SODIUM</li> <li>• L251 - LAB.MED.-BIOCHEM.-UREA NITROGEN (B.U.N.)</li> </ul>                                                                                                                                                                                                         |
| <p>LIPIDS</p> <ul style="list-style-type: none"> <li>• L055 - LAB. MED.-BIOCHEM-CHOLESTROL,TOTAL (NOT WITH L156).</li> <li>• L117 - LAB. MED.-BIOCHEM.-HIGH DENSITY LIPOPROTEIN CHOLESTEROL</li> <li>• L151 - LAB.MED-BIOCHEM.LIPID TOTAL</li> </ul>                                                                                                                                                                      |
| <p>DIABETES</p> <ul style="list-style-type: none"> <li>• L093 - LAB. MED.-BIOCHEM. GLYCOSYLATED HAEMOGLOBIN</li> <li>• L104 - LAB. MED.-BIOCHEM.-GLUCOSE TOLERANCE TEST</li> </ul>                                                                                                                                                                                                                                        |

**eTable 2. Medication Categories**

| Category         | Drug Name                                      |
|------------------|------------------------------------------------|
| ANTIHYPERTENSIVE | ACEBUTOLOL                                     |
| ANTIHYPERTENSIVE | ALISKIREN                                      |
| ANTIHYPERTENSIVE | AMILORIDE HCL                                  |
| ANTIHYPERTENSIVE | AMILORIDE HCL & HYDROCHLOROTHIAZIDE            |
| ANTIHYPERTENSIVE | AMLODIPINE BESYLATE                            |
| ANTIHYPERTENSIVE | AMLODIPINE BESYLATE & ATORVASTATIN<br>CALCIUM  |
| ANTIHYPERTENSIVE | AMLODIPINE BESYLATE & TELMISARTAN              |
| ANTIHYPERTENSIVE | ATENOLOL                                       |
| ANTIHYPERTENSIVE | ATENOLOL & CHLOROTHALIDONE                     |
| ANTIHYPERTENSIVE | BENAZEPRIL CHLOROHYDRATE                       |
| ANTIHYPERTENSIVE | BENAZEPRIL                                     |
| ANTIHYPERTENSIVE | BISOPROLOL FUMARATE                            |
| ANTIHYPERTENSIVE | CANDESARTAN CILEXETIL                          |
| ANTIHYPERTENSIVE | CANDESARTAN CILEXETIL &<br>HYDROCHLOROTHIAZIDE |
| ANTIHYPERTENSIVE | CAPTOPRIL                                      |
| ANTIHYPERTENSIVE | CARVEDILOL                                     |
| ANTIHYPERTENSIVE | CHLOROTHALIDONE                                |
| ANTIHYPERTENSIVE | CILAZAPRIL                                     |
| ANTIHYPERTENSIVE | CILAZAPRIL & HYDROCHLOROTHIAZIDE               |
| ANTIHYPERTENSIVE | DILTIAZEM                                      |
| ANTIHYPERTENSIVE | ENALAPRIL MALEATE                              |
| ANTIHYPERTENSIVE | ENALAPRIL SODIUM                               |
| ANTIHYPERTENSIVE | EPLERENONE                                     |
| ANTIHYPERTENSIVE | EPROSARTAN MESYLATE                            |
| ANTIHYPERTENSIVE | EPROSARTAN MESYLATE &<br>HYDROCHLOROTHIAZIDE   |
| ANTIHYPERTENSIVE | FELODIPINE                                     |
| ANTIHYPERTENSIVE | FOSINOPRIL SODIUM                              |
| ANTIHYPERTENSIVE | FUROSEMIDE                                     |
| ANTIHYPERTENSIVE | HYDROCHLOROTHIAZIDE                            |
| ANTIHYPERTENSIVE | HYDROCHLOROTHIAZIDE & IRBESARTAN               |
| ANTIHYPERTENSIVE | HYDROCHLOROTHIAZIDE & LISINAPRIL               |
| ANTIHYPERTENSIVE | HYDROCHLOROTHIAZIDE & LOSARTAN<br>POTASSIUM    |
| ANTIHYPERTENSIVE | HYDROCHLOROTHIAZIDE & METHYLDOPA               |
| ANTIHYPERTENSIVE | HYDROCHLOROTHIAZIDE & OLMESARTAN<br>MEDOXOMIL  |
| ANTIHYPERTENSIVE | HYDROCHLOROTHIAZIDE & PINDOLOL                 |
| ANTIHYPERTENSIVE | HYDROCHLOROTHIAZIDE & PROPRANOLOL<br>HCL       |
| ANTIHYPERTENSIVE | HYDROCHLOROTHIAZIDE & QUINAPRIL                |
| ANTIHYPERTENSIVE | HYDROCHLOROTHIAZIDE & RAMIPRIL                 |
| ANTIHYPERTENSIVE | HYDROCHLOROTHIAZIDE &<br>SPIRONOLACTONE        |
| ANTIHYPERTENSIVE | HYDROCHLOROTHIAZIDE & TELMISARTAN              |
| ANTIHYPERTENSIVE | HYDROCHLOROTHIAZIDE & TIMOLOL<br>MALEATE       |

|                             |                                             |
|-----------------------------|---------------------------------------------|
| ANTIHYPERTENSIVE            | HYDROCHLOROTHIAZIDE & TRIAMTERENE           |
| ANTIHYPERTENSIVE            | HYDROCHLOROTHIAZIDE & VALSARTAN             |
| ANTIHYPERTENSIVE            | INDAPAMIDE                                  |
| ANTIHYPERTENSIVE            | INDAPAMIDE & PERINDOPRIL<br>TERT.BUTYLAMINE |
| ANTIHYPERTENSIVE            | IRBESARTAN                                  |
| ANTIHYPERTENSIVE            | LABETALOL HCL                               |
| ANTIHYPERTENSIVE            | LISINOPRIL                                  |
| ANTIHYPERTENSIVE            | LOSARTAN POTASSIUM                          |
| ANTIHYPERTENSIVE            | METOLAZONE                                  |
| ANTIHYPERTENSIVE            | METOPROLOL                                  |
| ANTIHYPERTENSIVE            | METOPROLOL SUCCINATE                        |
| ANTIHYPERTENSIVE            | METOPROLOL SULFATE                          |
| ANTIHYPERTENSIVE            | METOPROLOL TARTRATE                         |
| ANTIHYPERTENSIVE            | NADOLOL                                     |
| ANTIHYPERTENSIVE            | NICARDIPINE HCL                             |
| ANTIHYPERTENSIVE            | NIFEDIPINE                                  |
| ANTIHYPERTENSIVE            | OLMESARTAN MEDOXOMIL                        |
| ANTIHYPERTENSIVE            | OPRENOLOL HCL                               |
| ANTIHYPERTENSIVE            | PERINDOPRIL TERT.BUTYLAMINE                 |
| ANTIHYPERTENSIVE            | PINDOLOL                                    |
| ANTIHYPERTENSIVE            | PROPIVERINE HCL                             |
| ANTIHYPERTENSIVE            | PROPRANOLOL HCL                             |
| ANTIHYPERTENSIVE            | QUINAPRIL                                   |
| ANTIHYPERTENSIVE            | RAMIPRIL                                    |
| ANTIHYPERTENSIVE            | SOTALOL                                     |
| ANTIHYPERTENSIVE            | SPIRONOLACTONE                              |
| ANTIHYPERTENSIVE            | TELMISARTAN                                 |
| ANTIHYPERTENSIVE            | TIMOLOL                                     |
| ANTIHYPERTENSIVE            | TIMOLOL MALEATE                             |
| ANTIHYPERTENSIVE            | TRANDOLAPRIL                                |
| ANTIHYPERTENSIVE            | TRIAMTERENE                                 |
| ANTIHYPERTENSIVE            | VALSARTAN                                   |
| ANTIHYPERTENSIVE            | VERAPAMIL HCL                               |
| ANTI-PLATELET/ANTICOAGULANT | ACENOCOUMAROL                               |
| ANTI-PLATELET/ANTICOAGULANT | ACETYLSALICYLIC ACID & DIPYRIDAMOLE         |
| ANTI-PLATELET/ANTICOAGULANT | ANAGRELIDE HCL                              |
| ANTI-PLATELET/ANTICOAGULANT | APIXABAN                                    |
| ANTI-PLATELET/ANTICOAGULANT | CLOPIDOGREL                                 |
| ANTI-PLATELET/ANTICOAGULANT | CLOPIDOGREL BISULFATE                       |
| ANTI-PLATELET/ANTICOAGULANT | DABIGATRAN ETEXILATE                        |
| ANTI-PLATELET/ANTICOAGULANT | DIPYRIDAMOLE                                |
| ANTI-PLATELET/ANTICOAGULANT | EDOXABAN TOSYLATE                           |
| ANTI-PLATELET/ANTICOAGULANT | PRASUGREL HCL                               |
| ANTI-PLATELET/ANTICOAGULANT | RIVAROXABAN                                 |
| ANTI-PLATELET/ANTICOAGULANT | TICAGRELOR                                  |
| ANTI-PLATELET/ANTICOAGULANT | TICLOPIDINE                                 |
| ANTI-PLATELET/ANTICOAGULANT | WARFARIN SODIUM                             |
| DIABETES                    | ACARBOSE                                    |
| DIABETES                    | CANAGLIFLOZIN                               |
| DIABETES                    | CHLORPROPAMIDE                              |
| DIABETES                    | DAPAGLIFLOZIN                               |
| DIABETES                    | DAPAGLIFLOZIN & METFORMIN HCL               |
| DIABETES                    | EMPAGLIFLOZIN                               |

|                |                                                                   |
|----------------|-------------------------------------------------------------------|
| DIABETES       | EMPAGLIFLOZIN & METFORMIN HCL                                     |
| DIABETES       | GLICLAZIDE                                                        |
| DIABETES       | GLIMEPIRIDE                                                       |
| DIABETES       | GLYBURIDE                                                         |
| DIABETES       | HUMAN INSULIN ISOPHANE RECOMBINANT                                |
| DIABETES       | HUMAN INSULIN RECOMBINANT                                         |
| DIABETES       | HUMAN INSULIN RECOMBINANT & HUMAN INSULIN ISOPHANE RECOMBINANT    |
| DIABETES       | HUMAN INSULIN ZINC RECOMBINANT                                    |
| DIABETES       | INSULIN                                                           |
| DIABETES       | INSULIN & INSULIN ISOPHANE                                        |
| DIABETES       | INSULIN (ZINC CRYSTALLINE) HUMAN BIOSYNTHETIC (RDNA ORIGIN)       |
| DIABETES       | INSULIN (ZINC) BEEF                                               |
| DIABETES       | INSULIN ASPART RECOMBINANT                                        |
| DIABETES       | INSULIN DEGLUDEC                                                  |
| DIABETES       | INSULIN DEGLUDEC                                                  |
| DIABETES       | INSULIN DETEMIR RECOMBINANT                                       |
| DIABETES       | INSULIN GLARGINE RECOMBINANT                                      |
| DIABETES       | INSULIN GLULISINE RECOMBINANT                                     |
| DIABETES       | INSULIN ISOPHANE                                                  |
| DIABETES       | INSULIN LISPRO RECOMBINANT                                        |
| DIABETES       | INSULIN LISPRO RECOMBINANT & INSULIN LISPRO PROTAMINE RECOMBINANT |
| DIABETES       | INSULIN PORCINE BASE                                              |
| DIABETES       | INSULIN PORCINE BASE ISOPHANE                                     |
| DIABETES       | INSULIN PROTAMINE ZINC                                            |
| DIABETES       | INSULIN ZINC                                                      |
| DIABETES       | LINAGLIPTIN                                                       |
| DIABETES       | LINAGLIPTIN & METFORMIN HCL                                       |
| DIABETES       | METFORMIN HCL                                                     |
| DIABETES       | METFORMIN HCL & SAXAGLIPTIN                                       |
| DIABETES       | METFORMIN HCL & SITAGLIPTIN PHOSPHATE                             |
| DIABETES       | NATEGLINIDE                                                       |
| DIABETES       | PIOGLITAZONE HCL                                                  |
| DIABETES       | REPAGLINIDE                                                       |
| DIABETES       | ROSIGLITAZONE MALEATE                                             |
| DIABETES       | SAXAGLIPTIN HCL                                                   |
| DIABETES       | SITAGLIPTIN PHOSPHATE                                             |
| DIABETES       | TOLBUTAMIDE                                                       |
| LIPID-LOWERING | ATORVASTATIN CALCIUM                                              |
| LIPID-LOWERING | BEZAFIBRATE                                                       |
| LIPID-LOWERING | CERIVASTATIN SODIUM                                               |
| LIPID-LOWERING | CLOFIBRATE                                                        |
| LIPID-LOWERING | FENOFIBRATE                                                       |
| LIPID-LOWERING | FLUVASTATIN                                                       |
| LIPID-LOWERING | FLUVASTATIN SODIUM                                                |
| LIPID-LOWERING | GEMFIBROZIL                                                       |
| LIPID-LOWERING | LOVASTATIN                                                        |
| LIPID-LOWERING | PRAVASTATIN                                                       |
| LIPID-LOWERING | PRAVASTATIN SODIUM                                                |
| LIPID-LOWERING | ROSUVASTATIN CALCIUM                                              |
| LIPID-LOWERING | SIMVASTATIN                                                       |

**eTable 3:** Participant characteristics of intervention building residents, control building residents, and intervention attendees who had prescription drug claim records available ( $\geq 66$  years or eligible for the Ontario Drug Benefit)

| <b>Demographic information</b> | <b>All buildings (N = 30)</b>                |                                                   |                                                  | <b>Subset of buildings (N = 26)</b>          |                                                   |                                                  |
|--------------------------------|----------------------------------------------|---------------------------------------------------|--------------------------------------------------|----------------------------------------------|---------------------------------------------------|--------------------------------------------------|
|                                | <b>Control</b><br>All residents<br>n = 1,721 | <b>Intervention</b><br>All residents<br>n = 1,761 | <b>Intervention</b><br>Attendees only<br>n = 399 | <b>Control</b><br>All residents<br>n = 1,388 | <b>Intervention</b><br>All residents<br>n = 1,311 | <b>Intervention</b><br>Attendees only<br>n = 355 |
| Age (years)                    |                                              |                                                   |                                                  |                                              |                                                   |                                                  |
| Mean $\pm$ SD                  | 73.23 $\pm$ 8.80                             | 73.60 $\pm$ 8.95                                  | 73.90 $\pm$ 8.79                                 | 74.29 $\pm$ 8.68                             | 74.11 $\pm$ 8.23                                  | 74.36 $\pm$ 8.43                                 |
| Median $\pm$ IQR               | 73 (66-79)                                   | 73 (67-80)                                        | 74 (67-80)                                       | 74 (68-80)                                   | 74 (68-80)                                        | 75 (68-80)                                       |
| Sex                            |                                              |                                                   |                                                  |                                              |                                                   |                                                  |
| Female                         | 1,079 (62.7%)                                | 1,208 (68.6%)                                     | 332 (83.2%)                                      | 913 (65.8%)                                  | 954 (72.8%)                                       | 298 (83.9%)                                      |
| Male                           | 642 (37.3%)                                  | 553 (31.4%)                                       | 67 (16.8%)                                       | 475 (34.2%)                                  | 357 (27.2%)                                       | 57 (16.1%)                                       |

**eTable 4.** Intention-to-Treat Analysis of Medication Initiation for All Intervention and Control Building Residents

| Medication category | No./total No. (%) of residents                      |                      |                                                                |                | AOR (95% CI) <sup>a</sup>     |
|---------------------|-----------------------------------------------------|----------------------|----------------------------------------------------------------|----------------|-------------------------------|
|                     | Baseline prevalence (N = 30 buildings) <sup>b</sup> |                      | Initiation of new medication (N = 30 buildings) <sup>b,c</sup> |                |                               |
|                     | Control                                             | Intervention         | Control                                                        | Intervention   |                               |
| Diabetes            | 418/172<br>1 (24.3)                                 | 437/1761<br>(24.8%)  | 22/1303<br>(1.7)                                               | 28/1324 (2.1)  | 1.25 (0.68-2.30)              |
| Antihypertensives   | 1169/17<br>21 (67.9)                                | 1261/1761<br>(71.6%) | 47/552<br>(8.5)                                                | 74/500 (14.8)  | 1.74 (1.19-2.53) <sup>d</sup> |
| Anticoagulants      | 279/172<br>1 (16.2)                                 | 281/1761<br>(16.0%)  | 69/1442<br>(4.8)                                               | 48/1481 (3.2%) | 0.68 (0.53-0.86) <sup>d</sup> |
| Statins or fibrates | 918/172<br>1 (53.3)                                 | 926/1761<br>(52.6%)  | 62/803<br>(7.7)                                                | 63/835 (7.5%)  | 0.98 (0.83-1.16)              |

Abbreviation: AOR, adjusted odds ratio.

<sup>a</sup>Adjusted for clustering of residents within buildings and the building pairing (trial design).

<sup>b</sup>Medication baseline prevalence and initiation were only available for individuals with a medication record in the administrative data (ie, eligible for the Ontario Drug Benefit).

<sup>c</sup>Medication initiation was restricted to individuals who had not taken a medication in that category for at least 12 months before the intervention.

<sup>d</sup>Statistically significant at  $P < .05$ .

**eTable 5:** Sensitivity analysis of healthcare utilization and medication initiation outcomes of building residents that attended the intervention program

| Binary outcomes                             | Baseline (N = 30 Buildings)           |                                           | Post-Intervention (N = 30 Buildings)       |                                           | Adjusted Odds Ratio <sup>a</sup><br>[95%CI]              |
|---------------------------------------------|---------------------------------------|-------------------------------------------|--------------------------------------------|-------------------------------------------|----------------------------------------------------------|
|                                             | Control<br>All residents<br>n = 1,846 | Intervention<br>Attendees only<br>n = 412 | Control<br>All residents<br>n = 1,846      | Intervention<br>Attendees only<br>n = 412 |                                                          |
| ED visits                                   | 689 (37.3%)                           | 184 (44.7%)                               | 764 (41.4%)                                | 206 (50.0%)                               | 1.10 [0.99,1.22]                                         |
| ED visits by ambulance                      | 368 (19.9%)                           | 91 (22.1%)                                | 463 (25.1%)                                | 121 (29.4%)                               | 1.09 [0.99,1.21]                                         |
| Hospital admissions                         | 264 (14.3%)                           | 64 (15.5%)                                | 338 (18.3%)                                | 79 (19.2%)                                | 1.02 [0.89,1.18]                                         |
| Home care services                          | 430 (23.3%)                           | 118 (28.6%)                               | 499 (27.0%)                                | 146 (35.4%)                               | <b>1.07 [1.01,1.13]</b>                                  |
| Transfers to long term care                 | -----                                 | -----                                     | 83 (4.5%)                                  | 6 (1.5%)                                  | <b>0.32 [0.13,0.81]</b>                                  |
| Kidney function lab test                    | 1,229 (66.6%)                         | 317 (76.9%)                               | 1,277 (69.2%)                              | 323 (78.4%)                               | 1.04 [0.98,1.10]                                         |
| Electrolyte lab test                        | 1,071 (58.0%)                         | 276 (67.0%)                               | 1,095 (59.3%)                              | 278 (67.5%)                               | 1.06 [0.97,1.15]                                         |
| Lipids lab test                             | 1,011 (54.8%)                         | 257 (62.4%)                               | 999 (54.1%)                                | 246 (59.7%)                               | 1.02 [0.95,1.11]                                         |
| Diabetes lab test                           | 946 (51.2%)                           | 248 (60.2%)                               | 1,000 (54.2%)                              | 262 (63.6%)                               | 1.06 [0.99,1.14]                                         |
| <b>Medication<sup>b</sup></b>               | <b>Baseline prevalence</b>            |                                           | <b>Initiation of new medication</b>        |                                           |                                                          |
|                                             | n = 1,721                             | n = 399                                   | n = 1,303; 552;<br>1,442; 803 <sup>b</sup> | n = 293; 98;<br>322; 179 <sup>b</sup>     |                                                          |
| Diabetes                                    | 418 (24.3%)                           | 106 (26.6%)                               | 22 (1.7%)                                  | 7 (2.4%)                                  | 1.42 [0.67, 3.00]                                        |
| Antihypertensives                           | 1,169 (67.9%)                         | 301 (75.4%)                               | 47 (8.5%)                                  | 23 (23.5%)                                | <b>2.76 [1.80, 4.22]</b>                                 |
| Anticoagulants                              | 279 (16.2%)                           | 77 (19.3%)                                | 69 (4.8%)                                  | 9 (2.8%)                                  | 0.58 [0.28, 1.20]                                        |
| Statins/fibrates                            | 918 (53.3%)                           | 220 (55.1%)                               | 62 (7.7%)                                  | 12 (6.7%)                                 | 0.87 [0.41, 1.83]                                        |
| <b>Continuous outcomes</b>                  | <b>Control</b>                        | <b>Intervention</b>                       | <b>Control</b>                             | <b>Intervention</b>                       | <b>Adjusted Incidence Rate Ratio<sup>a</sup> [95%CI]</b> |
|                                             | All residents                         | Attendees only                            | All residents                              | Attendees only                            |                                                          |
| Primary care visits                         | n = 1,846                             | n = 412                                   | n = 1,846                                  | n = 412                                   |                                                          |
| Mean ± SD                                   | 5.94 ± 6.59                           | 6.56 ± 6.54                               | 6.29 ± 6.77                                | 7.02 ± 6.08                               | <b>1.10 [1.03,1.17]</b>                                  |
| Hospitalization length of stay <sup>c</sup> | n = 264                               | n = 64                                    | n = 338                                    | n = 79                                    |                                                          |
| Mean ± SD                                   | 13.05 ± 21.89                         | 9.55 ± 10.53                              | 18.78 ± 37.20                              | 12.99 ± 19.54                             | 0.69 [0.46,1.04]                                         |

Notes: <sup>a</sup> Except for the ‘transfers to long term care’ and ‘initiation of new medication’ outcomes, all odds ratios and incident rate ratios were calculated using generalized estimated equation (GEE) models adjusted for clustering of residents within buildings, building pairing (trial design), and the baseline value. For the ‘transfers to long term care’ and ‘initiation of new medication’ outcomes, the GEE model was adjusted for clustering of residents within buildings and the building pairing only. <sup>b</sup> Medication initiation was restricted to individuals who had not taken a medication in that category for at least 12 months prior to the intervention and where a medication record was available in the administrative data (i.e., eligible for the Ontario Drug Benefit [ODB]). <sup>c</sup> The ‘hospitalization length of stay’ outcome was restricted to only those who had been hospitalized.



**eTable 6:** Sensitivity analysis of healthcare utilization and medication initiation outcomes of all building residents for a subset of buildings (N=26)

| Binary outcomes                             | Baseline (N = 26 Buildings)           |                                            | Post-Intervention (N = 26 Buildings)       |                                            | Adjusted Odds Ratio <sup>a</sup><br>[95%CI]              |
|---------------------------------------------|---------------------------------------|--------------------------------------------|--------------------------------------------|--------------------------------------------|----------------------------------------------------------|
|                                             | Control<br>All residents<br>n = 1,468 | Intervention<br>All residents<br>n = 1,358 | Control<br>All residents<br>n = 1,468      | Intervention<br>All residents<br>n = 1,358 |                                                          |
| ED visits                                   | 551 (37.5%)                           | 514 (37.8%)                                | 616 (42.0%)                                | 563 (41.5%)                                | 0.98 [0.90,1.06]                                         |
| ED visits by ambulance                      | 298 (20.3%)                           | 239 (17.6%)                                | 370 (25.2%)                                | 306 (22.5%)                                | 0.93 [0.83,1.04]                                         |
| Hospital admissions                         | 212 (14.4%)                           | 180 (13.3%)                                | 277 (18.9%)                                | 232 (17.1%)                                | 0.94 [0.84,1.05]                                         |
| Home care services                          | 352 (24.0%)                           | 294 (21.6%)                                | 409 (27.9%)                                | 361 (26.6%)                                | 1.00 [0.91,1.11]                                         |
| Transfers to long term care                 | -----                                 | -----                                      | 73 (5.0%)                                  | 55 (4.1%)                                  | 0.81 [0.62,1.08]                                         |
| Kidney function lab test                    | 1,009 (68.7%)                         | 996 (73.3%)                                | 1,045 (71.2%)                              | 1,004 (73.9%)                              | 0.99 [0.95,1.04]                                         |
| Electrolyte lab test                        | 887 (60.4%)                           | 858 (63.2%)                                | 909 (61.9%)                                | 870 (64.1%)                                | 1.00 [0.95,1.05]                                         |
| Lipids lab test                             | 831 (56.6%)                           | 813 (59.9%)                                | 812 (55.3%)                                | 814 (59.9%)                                | 1.04 [0.98,1.10]                                         |
| Diabetes lab test                           | 784 (53.4%)                           | 751 (55.3%)                                | 817 (55.7%)                                | 798 (58.8%)                                | 1.03 [0.98,1.07]                                         |
| <b>Medication<sup>b</sup></b>               | <b>Baseline prevalence</b>            |                                            | <b>Initiation of new medication</b>        |                                            |                                                          |
|                                             | n = 1,388                             | n = 1,311                                  | n = 1,044; 414;<br>1,146; 632 <sup>b</sup> | n = 988; 359;<br>1,094; 617 <sup>b</sup>   |                                                          |
| Diabetes                                    | 344 (24.8%)                           | 323 (24.6%)                                | 17 (1.6%)                                  | 24 (2.4%)                                  | 1.49 [0.74, 3.01]                                        |
| Antihypertensives                           | 974 (70.2%)                           | 952 (72.6%)                                | 35 (8.5%)                                  | 61 (17.0%)                                 | <b>2.01 [1.33, 3.04]</b>                                 |
| Anticoagulants                              | 242 (17.4%)                           | 217 (16.6%)                                | 57 (5.0%)                                  | 35 (3.2%)                                  | <b>0.64 [0.48, 0.86]</b>                                 |
| Statins/fibrates                            | 756 (54.5%)                           | 694 (52.9%)                                | 49 (7.8%)                                  | 48 (7.8%)                                  | 1.00 [0.81, 1.24]                                        |
| <b>Continuous outcomes</b>                  | <b>Control</b>                        | <b>Intervention</b>                        | <b>Control</b>                             | <b>Intervention</b>                        | <b>Adjusted Incidence Rate Ratio<sup>a</sup> [95%CI]</b> |
|                                             | All residents                         | All residents                              | All residents                              | All residents                              |                                                          |
| Primary care visits                         | n = 1,468                             | n = 1,358                                  | n = 1,468                                  | n = 1,358                                  |                                                          |
| Mean ± SD                                   | 5.94 ± 6.40                           | 6.42 ± 6.66                                | 6.28 ± 6.61                                | 6.63 ± 6.80                                | 1.01 [0.95,1.08]                                         |
| Hospitalization length of stay <sup>c</sup> | n = 212                               | n = 180                                    | n = 277                                    | n = 232                                    |                                                          |
| Mean ± SD                                   | 12.89 ± 22.84                         | 11.10 ± 19.90                              | 17.08 ± 28.17                              | 16.01 ± 23.25                              | 0.94 [0.80, 1.11]                                        |

Notes: <sup>a</sup>Except for the ‘transfers to long term care’ and ‘initiation of new medication’ outcomes, all odds ratios and incident rate ratios were calculated using generalized estimated equation (GEE) models adjusted for clustering of residents within buildings, building pairing (trial design), and the baseline value. For the ‘transfers to long term care’ and ‘initiation of new medication’ outcomes, the GEE model was adjusted for clustering of residents within buildings and the building pairing only. <sup>b</sup>Medication initiation was restricted to individuals who had not taken a medication in that category for at least 12 months prior to the intervention and where a medication record was available in the administrative data (i.e., eligible for the Ontario Drug Benefit [ODB]).<sup>c</sup>The ‘hospitalization length of stay’ outcome was restricted to only those who had been hospitalized.

**eTable 7:** Sensitivity analysis of healthcare utilization and medication initiation outcomes of building residents that attended the intervention program for a subset of buildings (N=26)

| Binary outcomes                             | Baseline (N = 26 Buildings)           |                                           | Post-Intervention (N = 26 Buildings)       |                                           | Adjusted Odds Ratio <sup>a</sup><br>[95%CI]              |
|---------------------------------------------|---------------------------------------|-------------------------------------------|--------------------------------------------|-------------------------------------------|----------------------------------------------------------|
|                                             | Control<br>All residents<br>n = 1,468 | Intervention<br>Attendees only<br>n = 362 | Control<br>All residents<br>n = 1,468      | Intervention<br>Attendees only<br>n = 362 |                                                          |
| ED visits                                   | 551 (37.5%)                           | 161 (44.5%)                               | 616 (42.0%)                                | 181 (50.0%)                               | 1.09 [0.97,1.23]                                         |
| ED visits by ambulance                      | 298 (20.3%)                           | 77 (21.3%)                                | 370 (25.2%)                                | 104 (28.7%)                               | 1.09 [0.96,1.23]                                         |
| Hospital admissions                         | 212 (14.4%)                           | 54 (14.9%)                                | 277 (18.9%)                                | 70 (19.3%)                                | 1.01 [0.85,1.19]                                         |
| Home care services                          | 352 (24.0%)                           | 97 (26.8%)                                | 409 (27.9%)                                | 125 (34.5%)                               | <b>1.08 [1.01,1.15]</b>                                  |
| Transfers to long term care                 | -----                                 | -----                                     | 73 (5.0%)                                  | 6 (1.7%)                                  | <b>0.33 [0.13, 0.85]</b>                                 |
| Kidney function lab test                    | 1,009 (68.7%)                         | 284 (78.5%)                               | 1,045 (71.2%)                              | 292 (80.7%)                               | 1.04 [0.98,1.11]                                         |
| Electrolyte lab test                        | 887 (60.4%)                           | 249 (68.8%)                               | 909 (61.9%)                                | 253 (69.9%)                               | 1.05 [0.95,1.15]                                         |
| Lipids lab test                             | 831 (56.6%)                           | 229 (63.3%)                               | 812 (55.3%)                                | 218 (60.2%)                               | 1.02 [0.95,1.10]                                         |
| Diabetes lab test                           | 784 (53.4%)                           | 220 (60.8%)                               | 817 (55.7%)                                | 231 (63.8%)                               | 1.06 [0.98,1.14]                                         |
| <b>Medication<sup>b</sup></b>               | <b>Baseline prevalence</b>            |                                           | <b>Initiation of new medication</b>        |                                           |                                                          |
|                                             | n = 1,388                             | n = 355                                   | n = 1,044; 414;<br>1,146; 632 <sup>b</sup> | n = 268; 87;<br>284; 164 <sup>b</sup>     |                                                          |
| Diabetes                                    | 344 (24.8%)                           | 87 (24.5%)                                | 17 (1.6%)                                  | 7 (2.6%)                                  | 1.60 [0.72, 3.57]                                        |
| Antihypertensives                           | 974 (70.2%)                           | 268 (75.5%)                               | 35 (8.5%)                                  | 22 (25.3%)                                | <b>2.99 [1.94, 4.60]</b>                                 |
| Anticoagulants                              | 242 (17.4%)                           | 71 (20.0%)                                | 57 (5.0%)                                  | 8 (2.3%)                                  | 0.57 [0.25, 1.28]                                        |
| Statins/fibrates                            | 756 (54.5%)                           | 191 (53.8%)                               | 49 (7.8%)                                  | 12 (7.3%)                                 | 0.94 [0.44, 2.00]                                        |
| <b>Continuous outcomes</b>                  | <b>Control</b>                        | <b>Intervention</b>                       | <b>Control</b>                             | <b>Intervention</b>                       | <b>Adjusted Incidence Rate Ratio<sup>a</sup> [95%CI]</b> |
|                                             | All residents                         | Attendees only                            | All residents                              | Attendees only                            |                                                          |
| Primary care visits                         | n = 1,468                             | n = 362                                   | n = 1,468                                  | n = 362                                   |                                                          |
| Mean ± SD                                   | 5.94 ± 6.40                           | 6.74 ± 6.74                               | 6.28 ± 6.61                                | 7.22 ± 6.21                               | <b>1.10 [1.04,1.19]</b>                                  |
| Hospitalization length of stay <sup>c</sup> | n = 212                               | n = 54                                    | n = 277                                    | n = 70                                    |                                                          |
| Mean ± SD                                   | 12.89 ± 22.84                         | 10.26 ± 11.19                             | 17.08 ± 28.17                              | 11.91 ± 13.31                             | <b>0.69 [0.49, 0.98]</b>                                 |

Notes: <sup>a</sup> Except for the ‘transfers to long term care’ and ‘initiation of new medication’ outcomes, all odds ratios and incident rate ratios were calculated using generalized estimated equation (GEE) models adjusted for clustering of residents within buildings, building pairing (trial design), and the baseline value. For the ‘transfers to long term care’ and ‘initiation of new medication’ outcomes, the GEE model was adjusted for clustering of residents within buildings and the building pairing only. <sup>b</sup> Medication initiation was restricted to individuals who had not taken a medication in that category for at least 12 months prior to the intervention and where a medication record was available in the administrative data (i.e., eligible for the Ontario Drug Benefit [ODB]). <sup>c</sup> The ‘hospitalization length of stay’ outcome was restricted to only those who had been hospitalized.
