# Supplementary material for: Community Paramedicine Program in Social Housing and Health Service Utilization: A Cluster Randomized Clinical Trial
Source: PubMed Central journal article supplement (PMC11581518; doi:10.1001/jamanetworkopen.2024.41288), 2024-10-28
Supplement: jamanetwopen-e2441288-s003.pdf [file jamanetwopen-e2441288-s003.pdf]

# Data Sharing Statement

Agarwal. Community Paramedicine Program in Social Housing and Health Service Utilization. *JAMA Netw Open*. Published October 28, 2024. doi:10.1001/jamanetworkopen.2024.41288

## Data

**Additional Information:** Clinicaltrials.gov, Clinicaltrials.gov, NCT02152891

**Data available:** Yes

**Data types:** Deidentified participant data

**How to access data:** The dataset from this study is held securely in coded form at ICES.

Although legal data sharing agreements between ICES and data providers (e.g., healthcare organisations and governments) prohibit ICES from making the dataset publicly available,

access may be granted to those who meet prespecified criteria for confidential access,

available at <https://www.ices.on.ca/DAS> ([das@ices.on.ca](mailto:das@ices.on.ca)). The full dataset creation plan and

underlying analytical code are available from the authors upon request, understanding that the

computer programs may rely upon coding templates or macros that are unique to ICES and

are therefore either inaccessible or may require modification.

**When available:** With publication

## Supporting Documents

**Document types:** None

## Additional Information

**Who can access the data:** The dataset from this study is held securely in coded form at ICES.

Although legal data sharing agreements between ICES and data providers (e.g., healthcare organisations and governments) prohibit ICES from making the dataset publicly available,

access may be granted to those who meet prespecified criteria for confidential access,

available at <https://www.ices.on.ca/DAS> ([das@ices.on.ca](mailto:das@ices.on.ca)). The full dataset creation plan and

underlying analytical code are available from the authors upon request, understanding that the

computer programs may rely upon coding templates or macros that are unique to ICES and

are therefore either inaccessible or may require modification.

**Types of analyses:** The dataset from this study is held securely in coded form at ICES.

Although legal data sharing agreements between ICES and data providers (e.g., healthcare organisations and governments) prohibit ICES from making the dataset publicly available,

access may be granted to those who meet prespecified criteria for confidential access,

available at <https://www.ices.on.ca/DAS> ([das@ices.on.ca](mailto:das@ices.on.ca)). The full dataset creation plan and

underlying analytical code are available from the authors upon request, understanding that the

computer programs may rely upon coding templates or macros that are unique to ICES and

are therefore either inaccessible or may require modification.

**Mechanisms of data availability:** The dataset from this study is held securely in coded form

at ICES. Although legal data sharing agreements between ICES and data providers (e.g.,

healthcare organisations and governments) prohibit ICES from making the dataset publicly

available, access may be granted to those who meet prespecified criteria for confidential

access, available at <https://www.ices.on.ca/DAS> ([das@ices.on.ca](mailto:das@ices.on.ca)). The full dataset creation

plan and underlying analytical code are available from the authors upon request,

understanding that the computer programs may rely upon coding templates or macros that are

unique to ICES and are therefore either inaccessible or may require modification.
